# Supplementary material
Source: Springer Nature journal article supplement (https://www.springermedizin.de/resource/supplementary/12967_2013_1422_MOESM1_ESM.pdf/9574686)

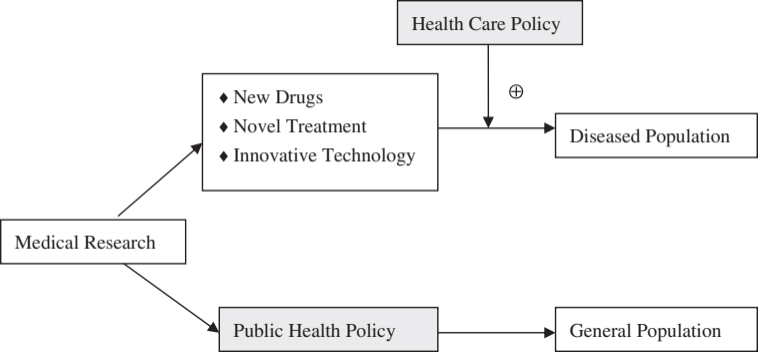

Supplement: MOESM1 [file 9574686]
